# Supplementary material
Source: MDPI journal article supplement (https://www.mdpi.com/1996-1073/16/9/3621)
Supplement: s1 [file s1]

# Supporting Information

## Improving Thermal Stability of Perovskite Solar Cells by Thermoplastic Additive Engineering

Zaheen Uddin<sup>1</sup>, Junhui Ran<sup>1,\*</sup>, Elias Stathatos<sup>2</sup> and Bin Yang<sup>1,\*</sup>

<sup>1</sup> College of Materials Science and Engineering, Hunan University, Changsha 410082, China

<sup>2</sup> Nanotechnology & Advanced Materials Laboratory, Department of Electrical and Computer Engineering, University of the Peloponnese, 26334 Patras, Greece

\* Correspondence: jhran@hnu.edu.cn (J.R.); yangb1@hnu.edu.cn (B.Y.)

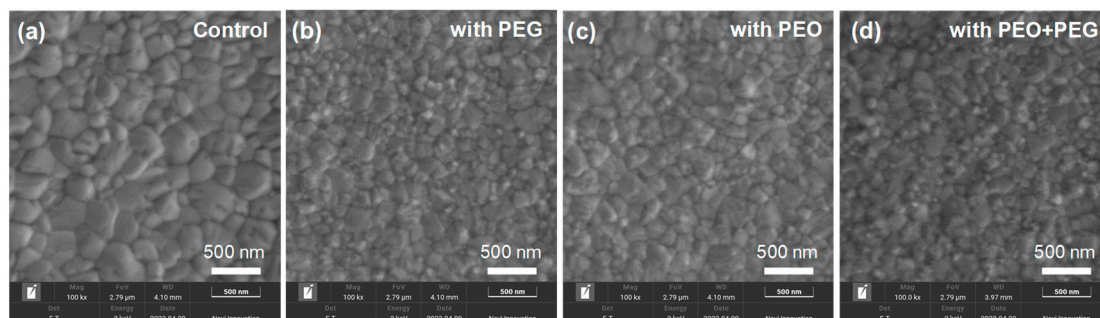

**Figure S1.** SEM images of (a) the control MAPbI<sub>3</sub> perovskite film, (b) PEG treated MAPbI<sub>3</sub> perovskite film, (c) PEO treated MAPbI<sub>3</sub> perovskite film and (d) PEO+PEG treated MAPbI<sub>3</sub> perovskite films. Scale bar: 500 nm.

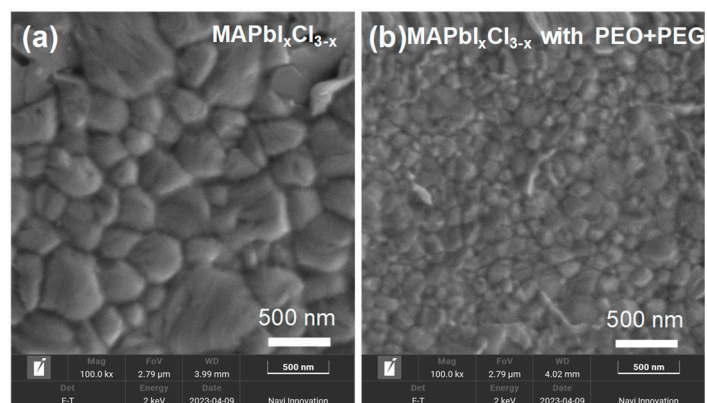

**Figure S2.** SEM images of (a) MAPbI<sub>x</sub>Cl<sub>3-x</sub> perovskite film (a) without and (b) with PEO+PEG treatment. MAPbI<sub>x</sub>Cl<sub>3-x</sub> perovskite film was prepared by two step method, similar to the fabrication of MAPbI<sub>3</sub> perovskites, and MAI was partially replaced by MACl with a concentration of 5 mg/mL.

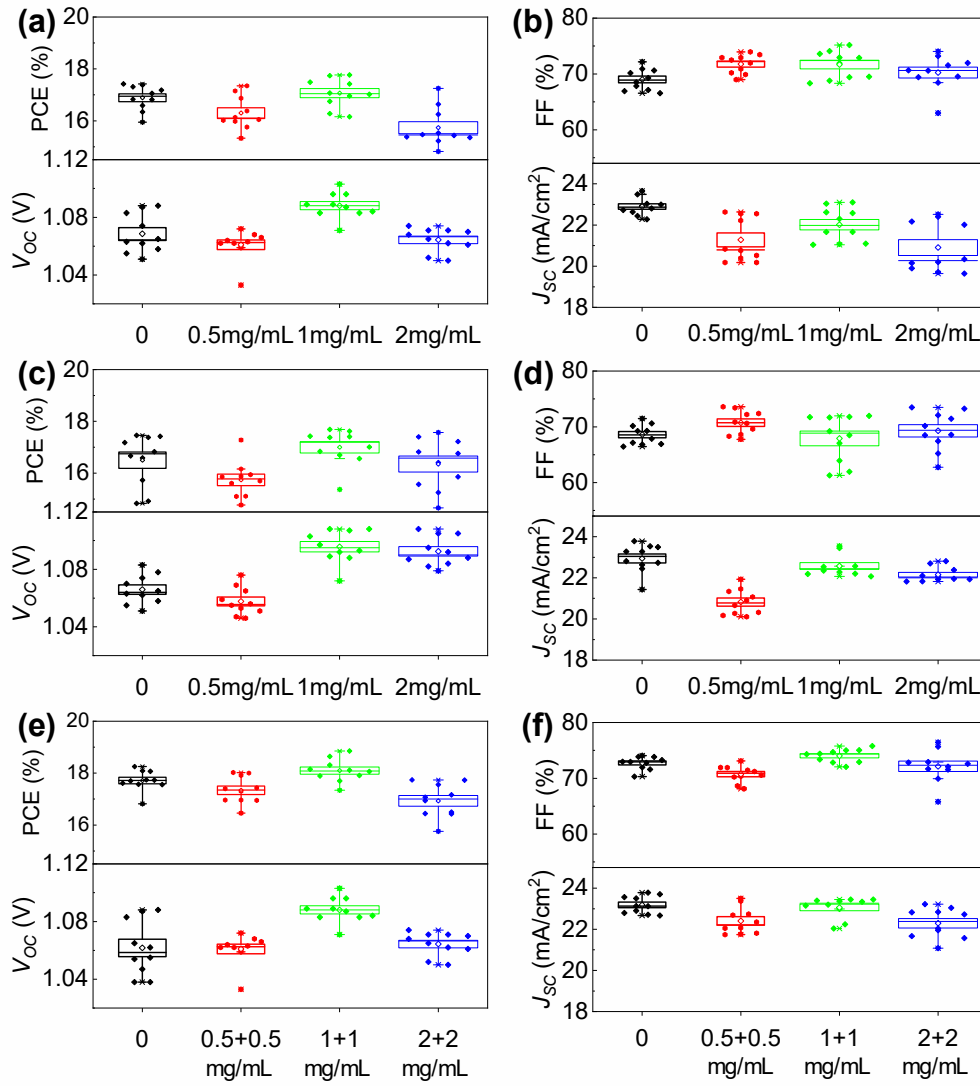

**Figure S3.** Statistical distribution of (a) PCE and  $V_{oc}$  and (b) FF and  $J_{sc}$  of the PSCs with different concentrations of PEG (0, 0.5, 1, and 2 mg/mL), (c) PCE and  $V_{oc}$  and (d) FF and  $J_{sc}$  of the PSCs with different concentrations of PEO (0, 0.5, 1, and 2 mg/mL), (e) PCE and  $V_{oc}$  and (f) FF and  $J_{sc}$  of the PSCs with different concentrations of PEO+PEG (0, 0.5+0.5, 1+1, and 2+2 mg/mL).

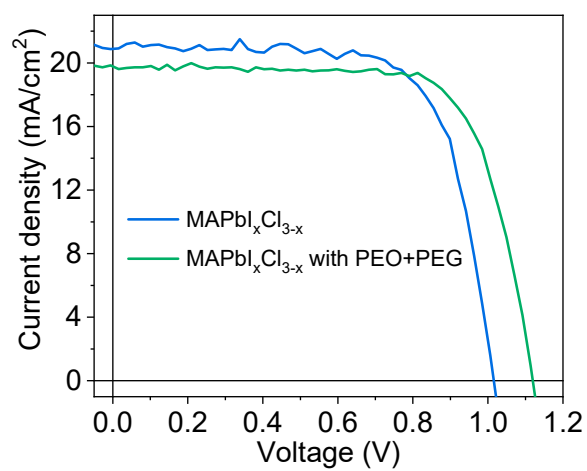

**Figure S4.**  $J$ - $V$  curves of the PSCs based on  $\text{MAPbI}_x\text{Cl}_{3-x}$  before and after PEO+PEG treatment.

**Table S1.** Photovoltaic parameters of the  $\text{MAPbI}_x\text{Cl}_{3-x}$  PSCs without and with PEO+PEG treatment.

| Devices                                      | $V_{oc}$ (V) | $J_{sc}$ (mA/cm <sup>2</sup> ) | FF   | PCE (%) |
|----------------------------------------------|--------------|--------------------------------|------|---------|
| $\text{MAPbI}_x\text{Cl}_{3-x}$              | 1.021        | 22.91                          | 0.70 | 15.11   |
| $\text{MAPbI}_x\text{Cl}_{3-x}$ with PEO+PEG | 1.120        | 19.61                          | 0.69 | 15.21   |
